# Supplementary material for: Usefulness of Systemic Venous Ultrasound Protocols in the Prognosis of Heart Failure Patients: Results from a Prospective Multicentric Study
Source: Preprints.org preprint supplement (doi:10.20944/preprints202301.0010.v1), 2023-01-03
Supplement: Supplementary file 3 [file supplementary]

**Appendix A: ROC analysis from all ultrasound parameters**

1. **ROC CURVE TO PREDICT MORTALITY (GLOBAL):**

| Test Result Variable(s) | Area | Std. Errora | Asymptotic Sig.b | Asymptotic 95% Confidence Interval | |
| --- | --- | --- | --- | --- | --- |
| Lower Bound | Upper Bound |
| ICV on admission: 2 cm or more | ,490 | ,127 | ,934 | ,241 | ,738 |
| Simplified Suprahepatic Score on admission | ,448 | ,123 | ,680 | ,207 | ,689 |
| Simplified Portal Score on admission | ,625 | ,128 | ,322 | ,374 | ,876 |
| Simplified Intra-renal Score on admission | ,583 | ,132 | ,509 | ,324 | ,843 |
| VEXUS 3 on admission | ,635 | ,129 | ,283 | ,383 | ,887 |
| ICV at discharge: 2 cm or more | ,396 | ,114 | ,409 | ,173 | ,618 |
| Simplified Suprahepatic Score at discharge | ,438 | ,118 | ,620 | ,205 | ,670 |
| Simplified Portal Score at discharge | ,479 | ,122 | ,869 | ,240 | ,719 |
| Simplified Intra-renal Score at discharge | ,531 | ,130 | ,804 | ,276 | ,786 |
| VExUS 3 at discharge | ,458 | ,118 | ,741 | ,227 | ,690 |
| ICV at review: 2 cm or more | ,771 | ,072 | ,032 | ,629 | ,912 |
| Simplified Suprahepatic Score at review | ,542 | ,129 | ,741 | ,289 | ,795 |
| Simplified Porta Score at review | ,611 | ,117 | ,378 | ,383 | ,839 |
| Simplified Intra-renal Score at review | ,665 | ,098 | ,191 | ,473 | ,857 |
| VEXUS 3 at review | ,438 | ,114 | ,620 | ,214 | ,661 |

1. **ROC CURVE TO PREDICT MORTALITY DURING ADMISSION:**

| Test Result Variable(s) | Area | Std. Errora | Asymptotic Sig.b | Asymptotic 95% Confidence Interval | |
| --- | --- | --- | --- | --- | --- |
| Lower Bound | Upper Bound |
| ICV on admission: 2 cm or more | ,663 | ,147 | ,436 | ,375 | ,952 |
| Simplified Suprahepatic Score on admission | ,798 | ,095 | ,156 | ,611 | ,985 |
| Simplified Portal Score on admission | ,875 | ,065 | ,074 | ,747 | 1,000 |
| Simplified Intra-renal Score on admission | ,923 | ,046 | ,044 | ,834 | 1,000 |
| VEXUS 3 on admission | ,885 | ,061 | ,067 | ,764 | 1,000 |
| ICV at discharge: 2 cm or more | ,317 | ,140 | ,384 | ,043 | ,592 |
| Simplified Suprahepatic Score at discharge | ,356 | ,155 | ,492 | ,052 | ,659 |
| Simplified Portal Score at discharge | ,481 | ,203 | ,927 | ,084 | ,878 |
| Simplified Intra-renal Score at discharge | ,442 | ,188 | ,783 | ,074 | ,811 |
| VExUS 3 at discharge | ,462 | ,195 | ,855 | ,079 | ,844 |
| ICV at review: 2 cm or more | ,750 | ,114 | ,234 | ,526 | ,974 |
| Simplified Suprahepatic Score at review | ,365 | ,158 | ,521 | ,055 | ,676 |
| Simplified Porta Score at review | ,769 | ,094 | ,200 | ,585 | ,954 |
| Simplified Intra-renal Score at review | ,683 | ,079 | ,384 | ,527 | ,838 |
| VEXUS 3 at review | ,442 | ,188 | ,783 | ,074 | ,811 |

1. **ROC CURVE TO PREDICT HEART FAILURE RELATED MORTALITY:**

| Test Result Variable(s) | Area | Std. Errora | Asymptotic Sig.b | Asymptotic 95% Confidence Interval | |
| --- | --- | --- | --- | --- | --- |
| Lower Bound | Upper Bound |
| ICV on admission: 2 cm or more | ,667 | ,123 | ,336 | ,427 | ,907 |
| Simplified Suprahepatic Score on admission | ,451 | ,169 | ,777 | ,120 | ,782 |
| Simplified Portal Score on admission | ,882 | ,055 | ,027 | ,774 | ,990 |
| Simplified Intra-renal Score on admission | ,755 | ,164 | ,141 | ,434 | 1,000 |
| VEXUS 3 on admission | ,892 | ,052 | ,023 | ,791 | ,994 |
| ICV at discharge: 2 cm or more | ,314 | ,117 | ,282 | ,085 | ,542 |
| Simplified Suprahepatic Score at discharge | ,529 | ,176 | ,865 | ,184 | ,875 |
| Simplified Portal Score at discharge | ,480 | ,167 | ,910 | ,153 | ,808 |
| Simplified Intra-renal Score at discharge | ,618 | ,188 | ,497 | ,249 | ,986 |
| VExUS 3 at discharge | ,461 | ,161 | ,821 | ,145 | ,777 |
| ICV at review: 2 cm or more | ,755 | ,095 | ,141 | ,568 | ,942 |
| Simplified Suprahepatic Score at review | ,539 | ,177 | ,821 | ,192 | ,887 |
| Simplified Porta Score at review | ,775 | ,080 | ,113 | ,618 | ,931 |
| Simplified Intra-renal Score at review | ,686 | ,072 | ,282 | ,545 | ,828 |
| VEXUS 3 at review | ,441 | ,155 | ,734 | ,137 | ,746 |

1. **ROC CURVE TO PREDICT RE-ADMISSION:**

| Test Result Variable(s) | Area | Std. Errora | Asymptotic Sig.b | Asymptotic 95% Confidence Interval | |
| --- | --- | --- | --- | --- | --- |
| Lower Bound | Upper Bound |
| ICV on admission: 2 cm or more | ,580 | ,080 | ,333 | ,423 | ,738 |
| Simplified Suprahepatic Score on admission | ,577 | ,082 | ,351 | ,416 | ,739 |
| Simplified Portal Score on admission | ,611 | ,083 | ,183 | ,448 | ,773 |
| Simplified Intra-renal Score on admission | ,601 | ,084 | ,225 | ,436 | ,766 |
| VEXUS 3 on admission | ,625 | ,083 | ,133 | ,462 | ,787 |
| ICV at discharge: 2 cm or more | ,594 | ,083 | ,258 | ,432 | ,756 |
| Simplified Suprahepatic Score at discharge | ,611 | ,083 | ,183 | ,448 | ,773 |
| Simplified Portal Score at discharge | ,512 | ,084 | ,885 | ,348 | ,676 |
| Simplified Intra-renal Score at discharge | ,536 | ,084 | ,664 | ,371 | ,701 |
| VExUS 3 at discharge | ,483 | ,082 | ,842 | ,322 | ,645 |
| ICV at review: 2 cm or more | ,587 | ,081 | ,293 | ,428 | ,747 |
| Simplified Suprahepatic Score at review | ,706 | ,079 | ,013 | ,550 | ,862 |
| Simplified Porta Score at review | ,605 | ,082 | ,205 | ,445 | ,765 |
| Simplified Intra-renal Score at review | ,620 | ,083 | ,150 | ,457 | ,782 |
| VEXUS 3 at review | ,617 | ,085 | ,158 | ,451 | ,783 |

1. **ROC CURVE TO PREDICT RE-ADMISSION DURING THE FIRST MONTH:**

| Test Result Variable(s) | Area | Std. Errora | Asymptotic Sig.b | Asymptotic 95% Confidence Interval | |
| --- | --- | --- | --- | --- | --- |
| Lower Bound | Upper Bound |
| ICV on admission: 2 cm or more | ,584 | ,092 | ,396 | ,402 | ,765 |
| Simplified Suprahepatic Score on admission | ,518 | ,099 | ,855 | ,325 | ,711 |
| Simplified Portal Score on admission | ,725 | ,093 | ,022 | ,543 | ,907 |
| Simplified Intra-renal Score on admission | ,669 | ,101 | ,086 | ,471 | ,867 |
| VEXUS 3 on admission | ,737 | ,093 | ,016 | ,555 | ,918 |
| ICV at discharge: 2 cm or more | ,564 | ,099 | ,512 | ,370 | ,759 |
| Simplified Suprahepatic Score at discharge | ,611 | ,100 | ,260 | ,415 | ,807 |
| Simplified Portal Score at discharge | ,477 | ,096 | ,813 | ,289 | ,664 |
| Simplified Intra-renal Score at discharge | ,601 | ,104 | ,303 | ,398 | ,805 |
| VExUS 3 at discharge | ,453 | ,093 | ,637 | ,271 | ,636 |
| ICV at review: 2 cm or more | ,802 | ,059 | ,002 | ,687 | ,917 |
| Simplified Suprahepatic Score at review | ,737 | ,093 | ,016 | ,555 | ,918 |
| Simplified Porta Score at review | ,771 | ,070 | ,006 | ,633 | ,908 |
| Simplified Intra-renal Score at review | ,879 | ,046 | ,000 | ,789 | ,970 |
| VEXUS 3 at review | ,716 | ,102 | ,028 | ,516 | ,916 |

1. **ROC CURVE TO PREDICT HEART FAILURE RE-ADMISSION:**

| Test Result Variable(s) | Area | Std. Errora | Asymptotic Sig.b | Asymptotic 95% Confidence Interval | |
| --- | --- | --- | --- | --- | --- |
| Lower Bound | Upper Bound |
| ICV on admission: 2 cm or more | ,595 | ,083 | ,274 | ,433 | ,757 |
| Simplified Suprahepatic Score on admission | ,592 | ,086 | ,291 | ,423 | ,761 |
| Simplified Portal Score on admission | ,611 | ,088 | ,204 | ,439 | ,782 |
| Simplified Intra-renal Score on admission | ,544 | ,089 | ,614 | ,370 | ,718 |
| VEXUS 3 on admission | ,624 | ,088 | ,154 | ,452 | ,796 |
| ICV at discharge: 2 cm or more | ,557 | ,088 | ,516 | ,385 | ,728 |
| Simplified Suprahepatic Score at discharge | ,611 | ,088 | ,204 | ,439 | ,782 |
| Simplified Portal Score at discharge | ,518 | ,088 | ,839 | ,345 | ,691 |
| Simplified Intra-renal Score at discharge | ,464 | ,085 | ,677 | ,297 | ,630 |
| VExUS 3 at discharge | ,491 | ,087 | ,915 | ,321 | ,660 |
| ICV at review: 2 cm or more | ,659 | ,081 | ,069 | ,501 | ,817 |
| Simplified Suprahepatic Score at review | ,669 | ,086 | ,053 | ,500 | ,838 |
| Simplified Porta Score at review | ,670 | ,082 | ,052 | ,510 | ,830 |
| Simplified Intra-renal Score at review | ,573 | ,087 | ,399 | ,403 | ,744 |
| VEXUS 3 at review | ,553 | ,089 | ,542 | ,378 | ,728 |
